# Supplementary material for: Terbium doped SnO2 nanoparticles as white emitters and SnO2:5Tb/Fe3O4 magnetic luminescent nanohybrids for hyperthermia application and biocompatibility with HeLa cancer cells
Source: Royal Society of Chemistry journal article supplement (doi:10.1039/c4dt03000a), 2015-01-01
Supplement: c4dt03000a1.pdf [file c4dt03000a1.pdf]

**Terbium doped SnO<sub>2</sub> nanoparticles as white emitter and SnO<sub>2</sub>:5Tb/Fe<sub>3</sub>O<sub>4</sub> magnetic luminescent nanohybrid for hyperthermia application and biocompatibility with HeLa cancer cells**

Laishram Priyobarta Singh, Ningthoujam Premananda Singh, Sri Krishna. Srivastava\*

*Department of Chemistry, Manipur University, Imphal-795003, Manipur, India.*

*\*Corresponding author:*

*E-mail: [sksrivastava01@yahoo.co.in](mailto:sksrivastava01@yahoo.co.in)  
Phone: 08974010573, Fax: 0385-2435831*

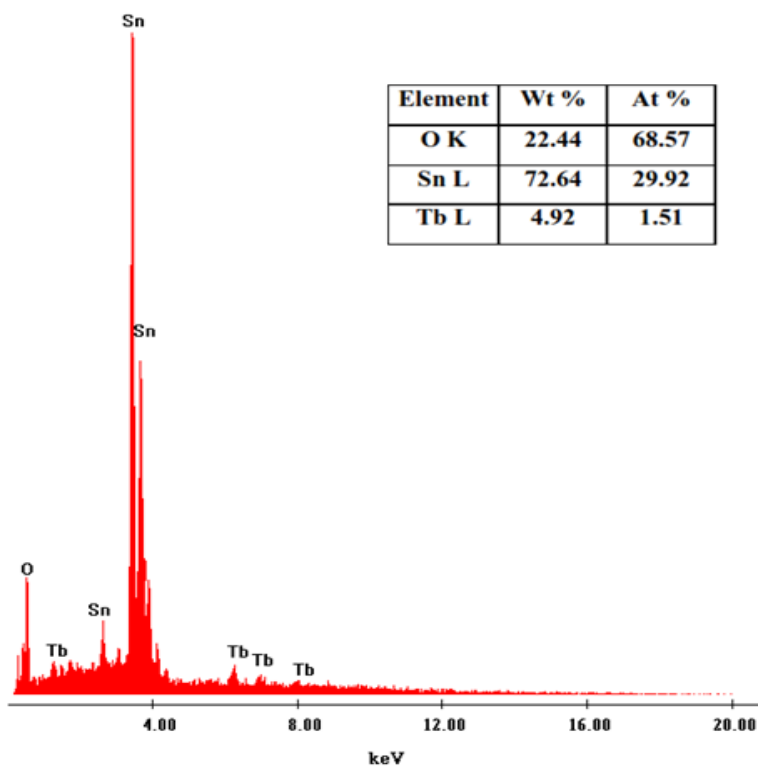

SI 1. EDAX spectra of SnO<sub>2</sub>:5Tb nanoparticles.

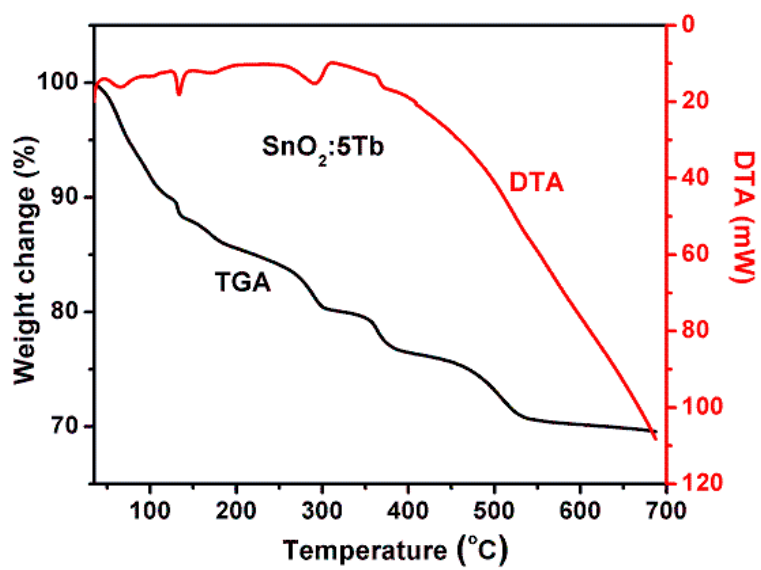

SI 2. TGA-DTA for SnO<sub>2</sub>:5Tb nanoparticles

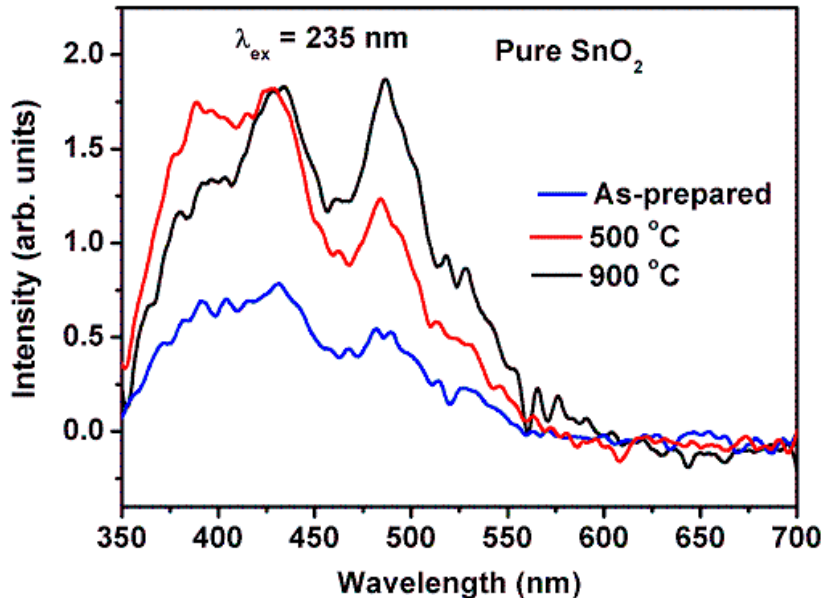

SI 3. Emission spectra of pure SnO<sub>2</sub> nanoparticles at different annealing temperatures as-prepared, 500 and 900 °C. The emission peaks are obtained by exciting at 235 nm.

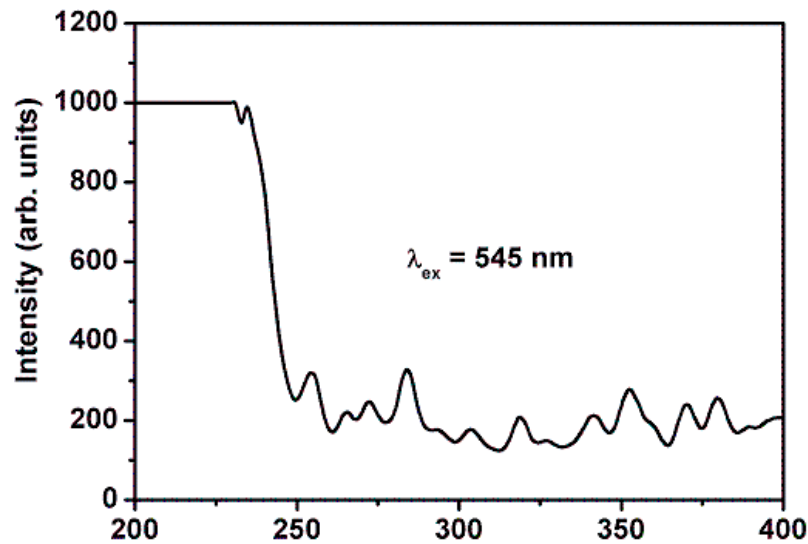

SI 4.  
monitor

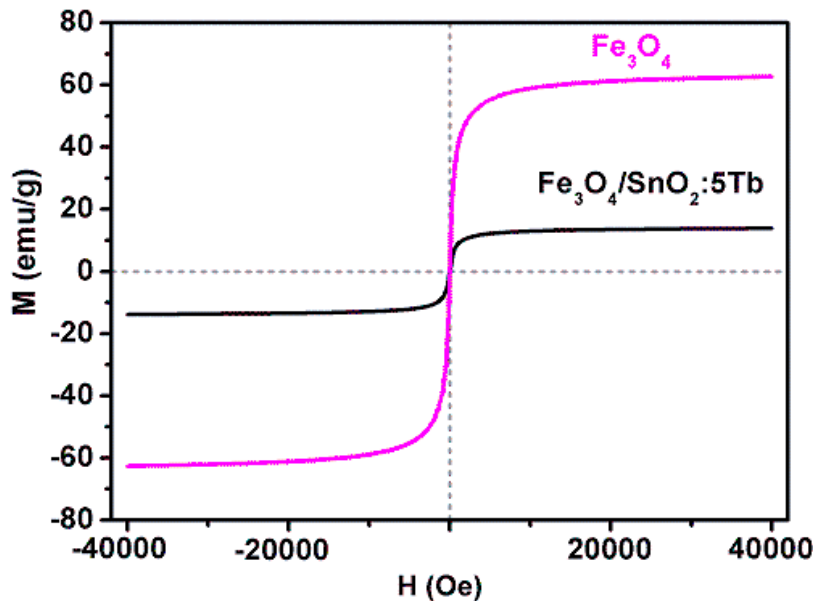

Excitation spectrum at 545 nm emission wavelength for SnO<sub>2</sub>:5Tb nanoparticles annealing at 900 °C.

**SI 5.** Magnetisation (H) *verses* applied magnetic field (H) for pure Fe<sub>3</sub>O<sub>4</sub> and SnO<sub>2</sub>:5Tb/Fe<sub>3</sub>O<sub>4</sub> nanohybrid.

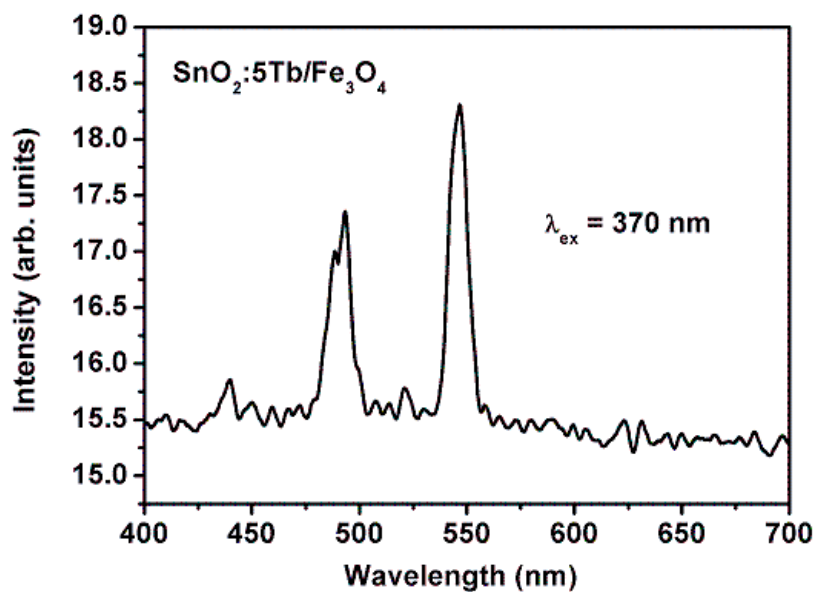

**SI 6.** Emission spectra of SnO<sub>2</sub>:5Tb/Fe<sub>3</sub>O<sub>4</sub> nanohybrid excited at 370 nm.

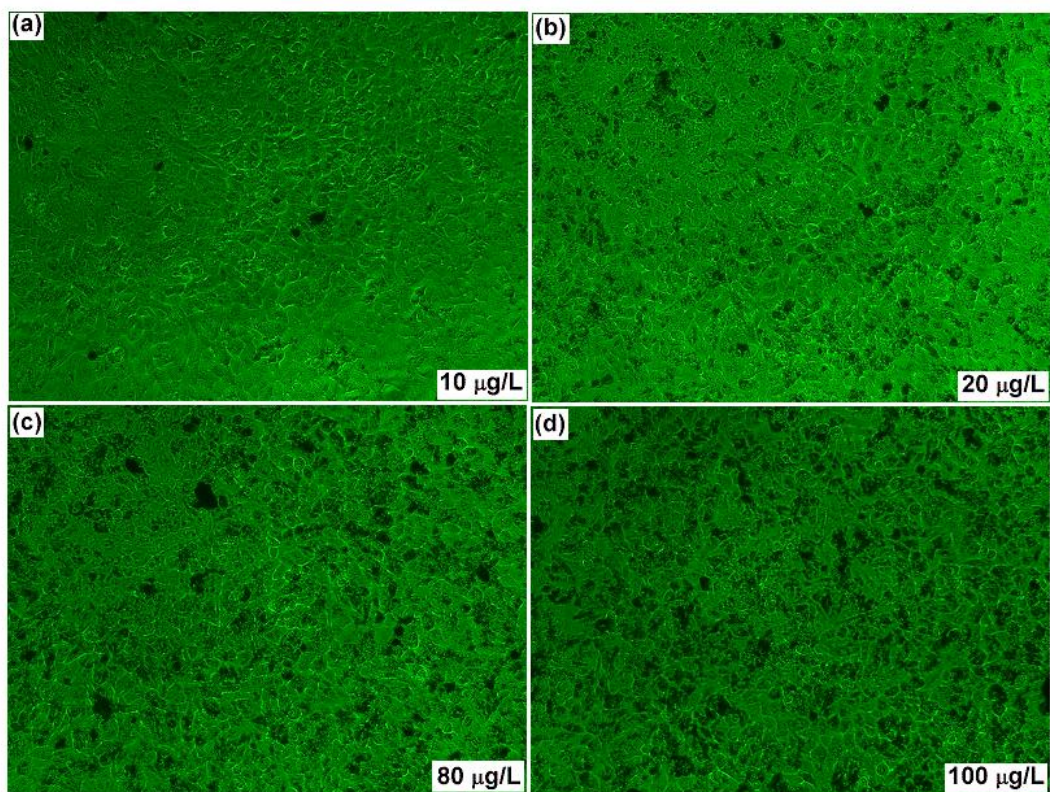

**SI 7.** Images of cell treated with  $\text{SnO}_2:5\text{Tb}/\text{Fe}_3\text{O}_4$  at different concentration of nano-hybrid ( $\text{SnO}_2:5\text{Tb}/\text{Fe}_3\text{O}_4$ ) (a) 10  $\mu\text{g}/\text{L}$  (b) 20  $\mu\text{g}/\text{L}$  (c) 80  $\mu\text{g}/\text{L}$  and 100  $\mu\text{g}/\text{L}$ , respectively.
